# Supplementary material for: The Predictive Factors and Model Construction of the Teaching Willingness of Post-2000s Pre-service Teachers Majoring in Early Childhood Education--A Mixed Method Study
Source: Research Square preprint supplement (doi:10.21203/rs.3.rs-6349583/v1), 2025-05-09
Supplement: Supplementary file 1 [file cd24b65f22629c382f58586d.docx]

Supplementary Material

# Supplementary interview outline

1. Why did you apply for early childhood education?
2. Do you like the occupation of the preschool teacher? What do you think of this profession? How to evaluate it?
3. Do you want to teach preschool students at the beginning of the school? What caused this decision?
4. Are you currently willing to teach as a preschool teacher?
5. (Engaged in) Where are you willing to teach, and in what type of work will you be engaged (authorized strength, filing system, garden quota system)? As a future preschool teacher, what do you think is the most significant difficulty in your future employment? What is in the most demand? What are the causes? What are the improvements or ideas? Why?
6. (Not engaged in) What are the main difficulties encountered at present? Do you have any other interested job intentions?
7. (If your willingness to teach changes) In transforming your initial teaching willingness into your current teaching intention, what factors strengthen and weaken your teaching willingness?
8. Is your decision to be a teacher influenced by others? Who strengthened your willingness to teach and weakened your willingness to teach?
9. Is your decision to be a teacher influenced by natural conditions (opportunities, resources)? What practical conditions promote or hinder you from being a teacher?
10. **Supplementary questionnaire**

A Questionnaire of Teaching Willingness of Post-2000s Pre-service Teachers Majoring in Early Childhood Education

Dear students:

Shalom!

First, thank you for taking time out of your busy schedule to complete the questionnaire. This questionnaire investigates the employment intention of post-2000 pre-service teachers majoring in early childhood education. The survey consists of two parts: basic personal information and employment intention scale, with a moderate number of questions. It is expected to take you about 15 minutes. An anonymous way is applied to this questionnaire, and all the information provided will be kept strictly confidential. Please read each item carefully and complete it according to the situation. I wish you success in school and a good life!

College students’ employment situation investigation team

March 14, 2024

**Part I Basic Information of Individuals And Family Members**

1. Which grade are you currently in? ( )

① freshman ② sophomore ③ junior ④ senior

2. Your age ( ), for example, 18

3. Your gender: ( )

1. male ② female

**Part Ⅱ Factors Influencing Teaching Willingness**

| No. | item | completely disagree（1） | disagree（2） | commonly agree（3） | agree（4） | totally agree（5） |
| --- | --- | --- | --- | --- | --- | --- |
|  | Would you like to be a preschool teacher when you were a freshman? |  |  |  |  |  |
|  | Would you like to be a preschool teacher right now? |  |  |  |  |  |
|  | Would you like to be a preschool teacher after graduation? |  |  |  |  |  |
| Self-efficacy | C1.1 I think I am a an excellent to be a preschool teacher. |  |  |  |  |  |
| C1.2 I think I can teach children well. |  |  |  |  |  |
| C2.1 I am capable of being a qualified preschool teacher. |  |  |  |  |  |
| Internal motivation | C3.1.I like to teach children. |  |  |  |  |  |
| C3.2 I like working with children. |  |  |  |  |  |
| C3.3 I want to find a job related to early childhood education. |  |  |  |  |  |
| C4.1 I dream of being a preschool teacher. |  |  |  |  |  |
| External motivation | C5.1 I like to be a preschool teacher because it is a stable job. |  |  |  |  |  |
| C6.1 I like to be a teacher because I have an extended vacation. |  |  |  |  |  |
| C6.2 I want to be a teacher because teachers have time to balance between work and family. |  |  |  |  |  |
| C6. This job offers me some convenience. (For example, I can get discounted ticket prices at scenic spots with the teacher qualification certificate) |  |  |  |  |  |
| C6.4I would like to be a teacher because there are winter and summer vacations. |  |  |  |  |  |
| Achievement motivation | C7.1 Being an early childhood education teacher helps me to influence the next generation. |  |  |  |  |  |
| C7.2 I am very satisfied to see the children’s progress. |  |  |  |  |  |
| C7.3 I feel very proud to see children’s progress and growth. |  |  |  |  |  |
| C8.1 I can make contributions to society by being a preschool teacher. |  |  |  |  |  |
| Family influence | C9.1 My parents think that being a preschool teacher is an enviable career. |  |  |  |  |  |
| C10.1 My family thinks that I should be a teacher. |  |  |  |  |  |
| C10.2 My family encouraged me to be a teacher. |  |  |  |  |  |
| Peer influence | C11.1 My friends encouraged me to be a preschool teacher. |  |  |  |  |  |
| C11.2 People I have been with all think I should be a preschool teacher. |  |  |  |  |  |
| C12.1 My classmates’ ideas and choices will affect my career choice. |  |  |  |  |  |
| Undergraduate education | C13.1 I am satisfied with the education in our school. |  |  |  |  |  |
| C13.2 In the daily study, I can deal with the theoretical courses very well. |  |  |  |  |  |
| C13.3 I can deal with the skill courses well in my daily study. |  |  |  |  |  |
| C13.4 The school offers a reasonable number of skill courses in each semester. |  |  |  |  |  |
| C13.5 The school provides us with rich internship and practice opportunities. |  |  |  |  |  |
| C13.6 I think I have learned a lot from the school courses. |  |  |  |  |  |
| C14.1 1In my undergraduate years, I met teachers who positively impacted on me. |  |  |  |  |  |
| C14.2 In my undergraduate years, all the course teachers I contacted were very responsible. |  |  |  |  |  |
| C14.3 In my undergraduate years, I met many good course teachers. |  |  |  |  |  |
| C15.1 The curriculum offered by the school can thoroughly combine theory and practice. |  |  |  |  |  |
| Internship kindergarten | C16.1 The educational internship experience makes me happy and helps me gain a lot. |  |  |  |  |  |
| C17.1 The educational internship experience helps me develop a clear understanding of the kindergarten system. |  |  |  |  |  |
| C18.1 The educational internship experience is of great significance to my teaching ability. |  |  |  |  |  |
| C18.2 The educational internship experience is very beneficial in improving my professional ability. |  |  |  |  |  |
| C19.1 I like the working atmosphere of the internship school. |  |  |  |  |  |
| Job characteristics | C20.1I can make a stable income to be a preschool teacher. |  |  |  |  |  |
| C20.2 I will consider whether to engage in the preschool teacher career because of the income problem. (Reverse score) |  |  |  |  |  |
| C20.3 If I have a job with a higher salary, I will give up early childhood education major. (Reverse score) |  |  |  |  |  |
| C21.1 Preschool teachers have a clear career promotion channel. |  |  |  |  |  |
| C22.1 Preschool teachers face a high work burden. (Reverse score) |  |  |  |  |  |
| C22.2 Preschool teachers face high working pressure. (Reverse score) |  |  |  |  |  |
| C23.1 Preschool teaching is a kind of high-status occupation valued by the society. |  |  |  |  |  |
| Employment demand | C24.1 I think there is very little demand for new teachers in kindergartens. (Reverse score) |  |  |  |  |  |
| C25.1 I think it is competitive to find a satisfactory preschool teacher job.(Reverse score) |  |  |  |  |  |
| Government policy | C26.1 If I can’t obtain an authorized strength, I will give up my major of early childhood education. (Reverse score) |  |  |  |  |  |
| C27.1 The current policies related to early childhood education do not impress me to be a preschool teacher. (Reverse score) |  |  |  |  |  |
| C27.2 Although China is paying more and more attention to developing early childhood education, this job is still not attractive to me. (Reverse score) |  |  |  |  |  |
| C27.3 The policy guidance of China for early childhood education makes me full of confidence in this profession. |  |  |  |  |  |
| C27.4 If other employment policies have an advantage for me, I will give up this major. (Reverse score) |  |  |  |  |  |
| Network media | C28.1 The Internet can help me gain access to resources related to early childhood education. |  |  |  |  |  |
| C29.1 Negative news about preschool teachers on the Internet will affect my willingness to teach. (Reverse score) |  |  |  |  |  |
| C29.2 Negative news on the Internet makes me afraid to deal with home ownership.(Reverse score) |  |  |  |  |  |
| C29.3 Negative news on the Internet will make me feel that I am not qualified as a preschool teacher.(Reverse score) |  |  |  |  |  |
